# Supplementary material for: Overoxidation and Oligomerization of Trypanosoma cruzi Cytosolic and Mitochondrial Peroxiredoxins
Source: MDPI journal article supplement (doi:10.3390/pathogens12101273), 2023-10-23
Supplement: s1 [file s1]

Supplementary Material; Piñeyro et al. Figure S1.

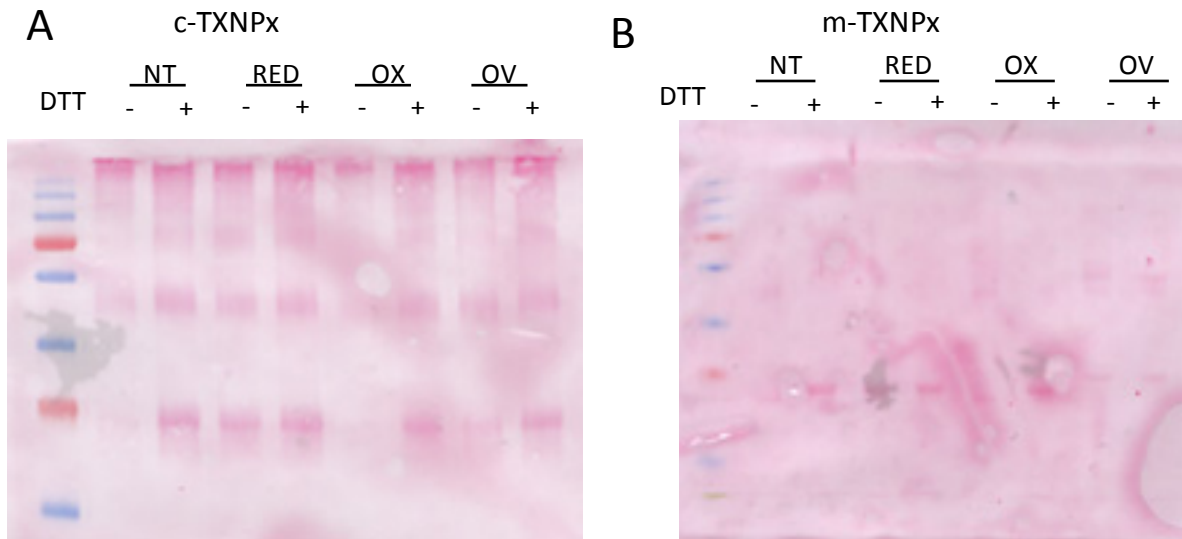

**Figure S1. Loading control of western blots shown in Figure 1A.**

3  $\mu$ g of proteins, A: c-TXNPx and B: m-TXNPx, treated: (RED): 10mM DTT; Oxidation (OX):  $\text{H}_2\text{O}_2$  (1:1 molar ratio); Overoxidation (OV): 10mM DTT and 10mM  $\text{H}_2\text{O}_2$ ; NT: proteins without treatment, were resolved by SDS-PAGE, transferred to nitrocellulose membranes and stained with Ponceau-S red as loading control.

Supplementary Material; Piñeyro et al. Figure S2.

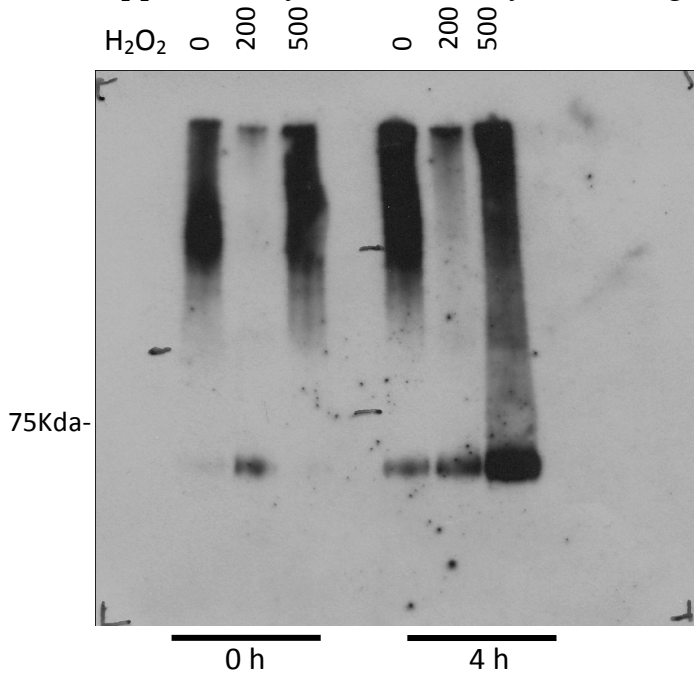

**Figure S2. Loading control of western blots shown in Figure 4.**

Protein extracts from exponentially growing epimastigotes incubated in PBS-1% glucose at two concentrations of H<sub>2</sub>O<sub>2</sub> (200 and 500  $\mu$ M) and lysed at different times (0 or 4 h) were resolved by Native Page followed by Western blot using anti tubulin antibody (Sigma). The membrane was analyzed with anti-c-TXNPx and anti-m-TXNPx antibodies, stripped and analyzed with anti-tubulin antibody.

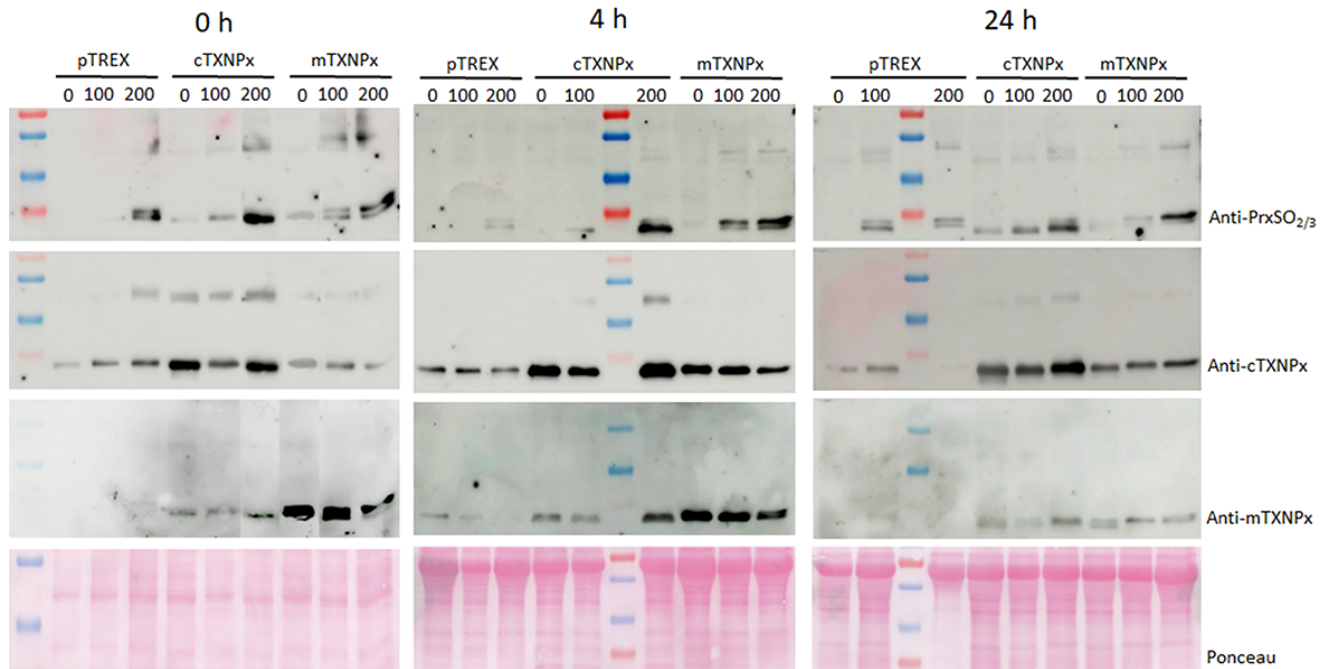

**Figure S3. Analysis of the dynamics of overoxidation over time in epimastigotes.**

Overexpressing c-TXNPx and m-TXNPx lines were treated with 100 and 200  $\mu\text{M}$   $\text{H}_2\text{O}_2$  for 30 min in PBS-1% glucose. Parasites were lysed at different times (0, 4, and 24 h) after growth in LIT medium and analyzed by Western Blot with anti- PrxSO<sub>2/3</sub> (1/1000) and 15  $\mu\text{g}$  of each extract. The membrane was stripped and analyzed for other antibodies: anti-c-TXNPx (1/5000), anti-m-TXNPx (1/1000). The loading control was performed by Ponceau-S red staining of the membrane.

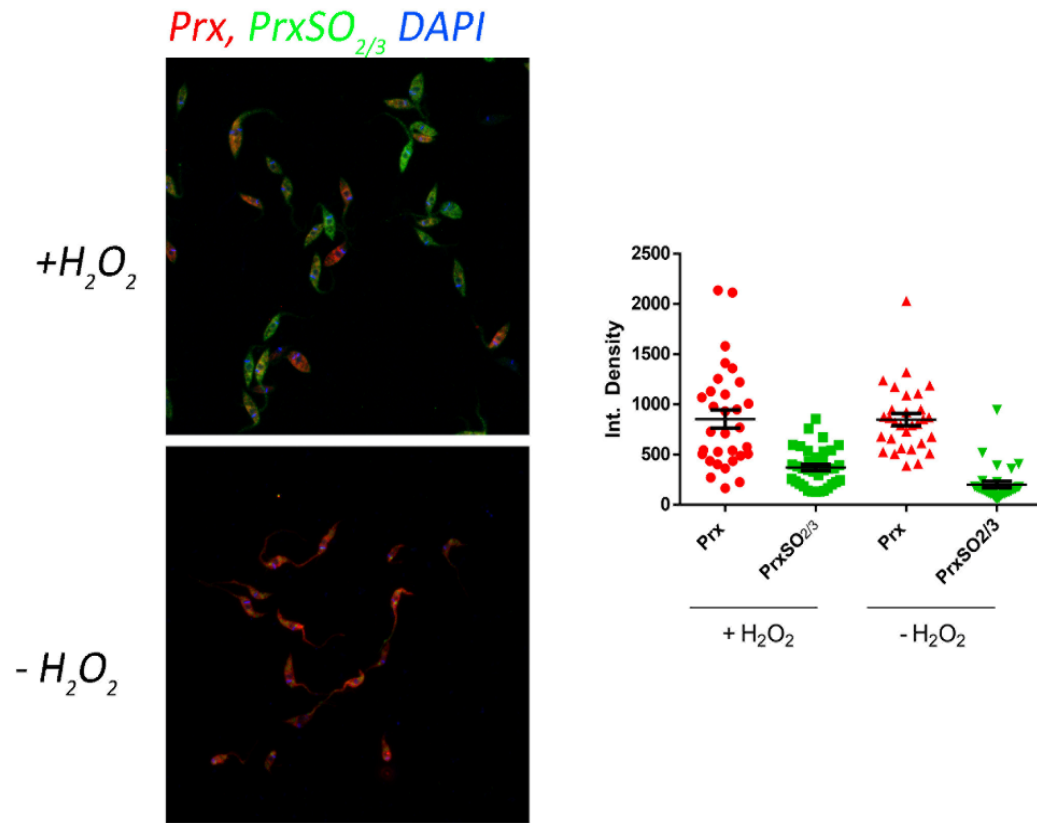

**Figure S4. Immunofluorescence of epimastigotes.**

Epimastigotes incubated with or without 500  $\mu\text{M}$  H<sub>2</sub>O<sub>2</sub> and stained with anti cTXNPx, anti PrxSO<sub>2/3</sub> or DAPI for nuclear and kinetoplast visualization. The graph shows the integrated density for c-TXNPx fluorescence (red) and PrxSO<sub>2/3</sub> (green) after incubation with or without 500  $\mu\text{M}$  H<sub>2</sub>O<sub>2</sub>. Integrated density was calculated with FIJI.

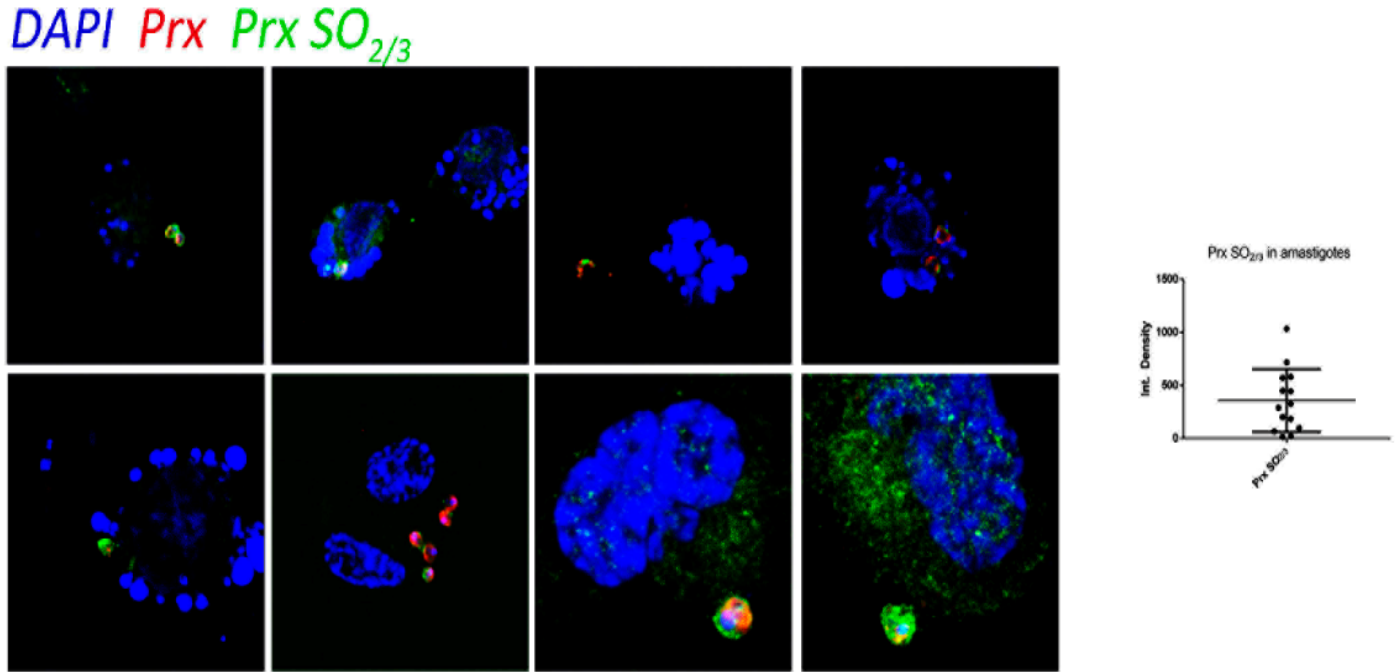

**Figure S5. Immunofluorescence of THP1 macrophages infected with trypomastigotes and fixed after internalization.**

Cells were stained with DAPI for nuclear and kinetoplast visualization, with anti c-TXNPx and with anti PrxSO<sub>2/3</sub> antibody. The graph shows the integrated density of PrxSO<sub>2/3</sub> fluorescence in intracellular amastigotes obtained with FIJI software.

Supplementary Material; Piñeyro et al. Figure S6.

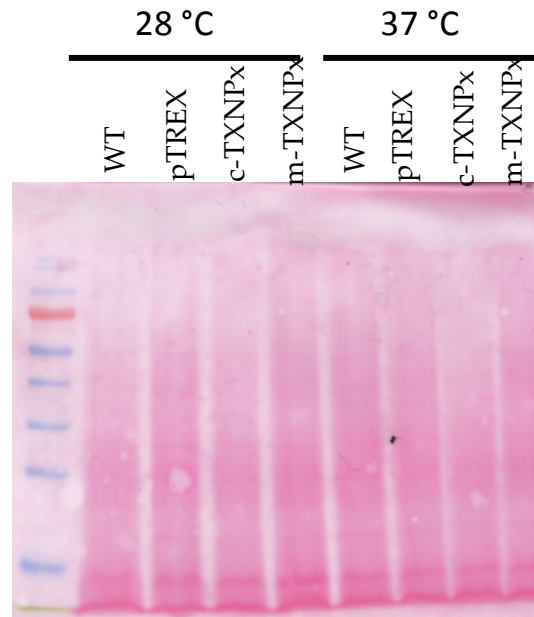

**Figure S6. Loading control of western blot shown in Figure 8B.**

Proteins extracts (20 $\mu$ l of 3.10<sup>6</sup> cells/mL) of parasites grown at 28°C or 37°C for 72 h, were resolved by SDS-PAGE, transferred to nitrocellulose membranes and stained with Ponceau-S red as loading control.
